# Supplementary material
Source: PubMed Central journal article supplement (PMC4226345)
Supplement: supp_pp.114.246769_246769suppfinal.pdf [file supp_pp.114.246769_246769suppfinal.pdf]

**Figure S1.** Phenotypic comparison between WT and *gsd1-D* mutant.

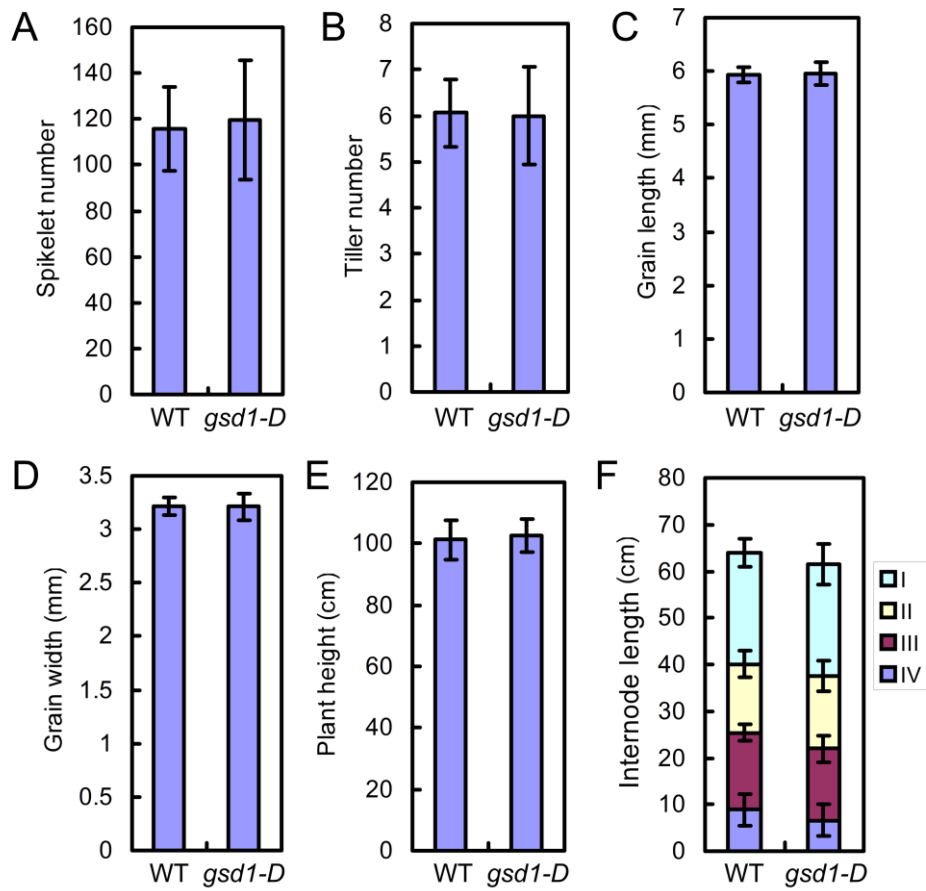

**(A)** The spikelet number per panicle between WT and *gsd1-D* mutant.

**(B)** The tiller number per plant between WT and *gsd1-D* mutant.

**(C)** The grain length between WT and *gsd1-D* mutant.

**(D)** The grain width between WT and *gsd1-D* mutant.

**(E)** The plant height between WT and *gsd1-D* mutant.

**(F)** The internode length between WT and *gsd1-D* mutant.

**Figure S2.** Microscopic analyses of rice flower morphology between wild-type and *gsd1-D* mutant at heading stage.

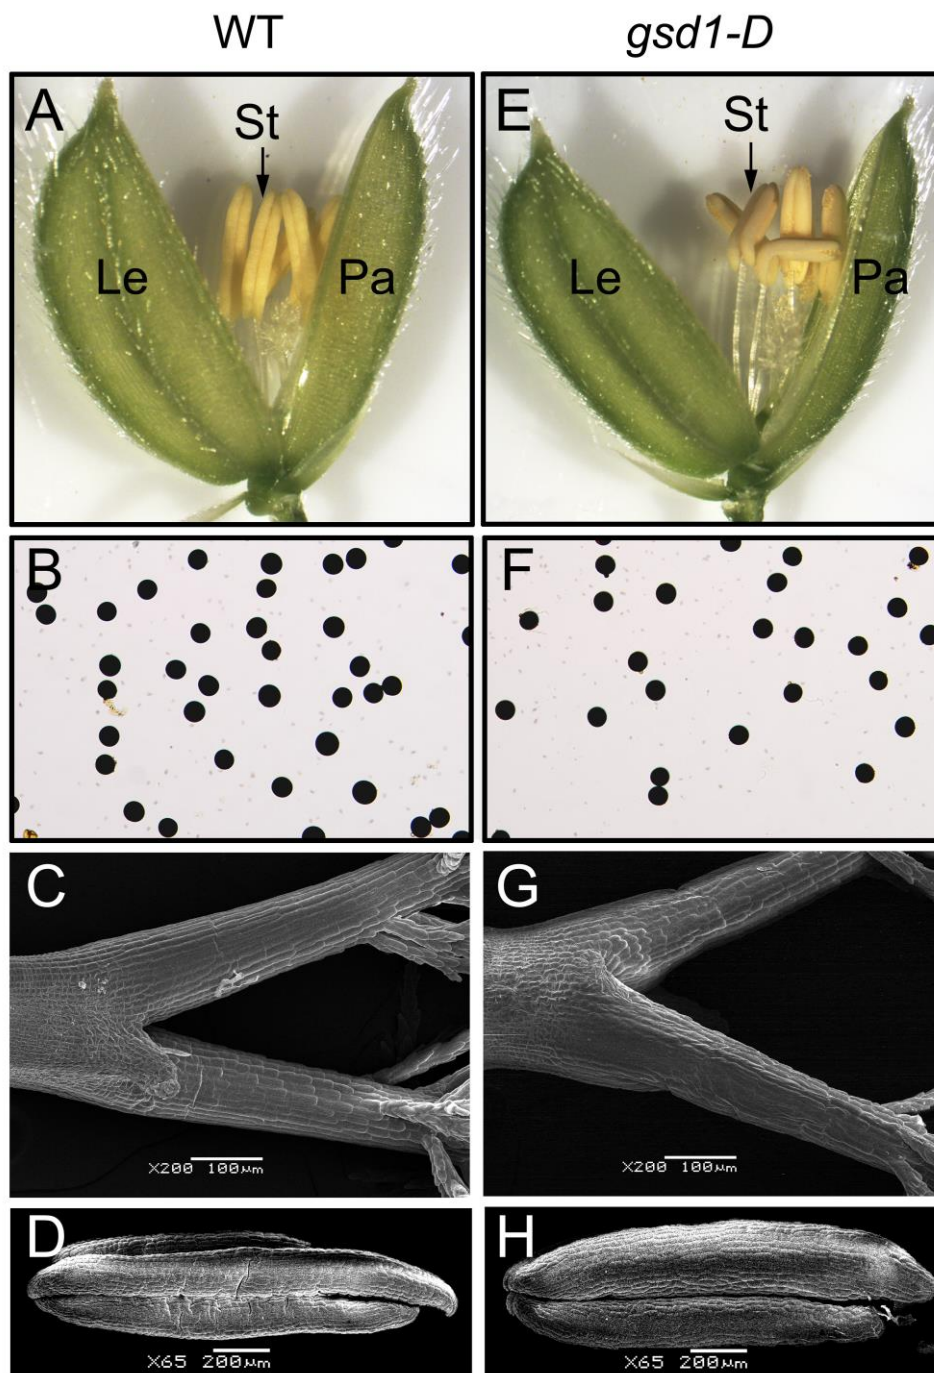

**(A)** and **(E)** Spikelet between WT **(A)** and *gsd1-D* mutant **(E)**. Le, lemma; Pa, palea; St, stamen.  
**(B)** and **(F)** I<sub>2</sub>-KI staining of flowering pollen in WT **(B)** and *gsd1-D* **(F)**.  
**(C)** and **(G)** SEM observation of pistils in WT **(C)** and *gsd1-D* mutant **(G)**.  
**(D)** and **(H)** SEM observation of anther surface of WT **(D)** and *gsd1-D* mutant **(H)**.

**Figure S3.** Comparison of anther development between WT and *gsd1-D* mutant from stage 6 to stage 12 according to established anther developmental stages in rice (Zhang and Wilson, 2009).

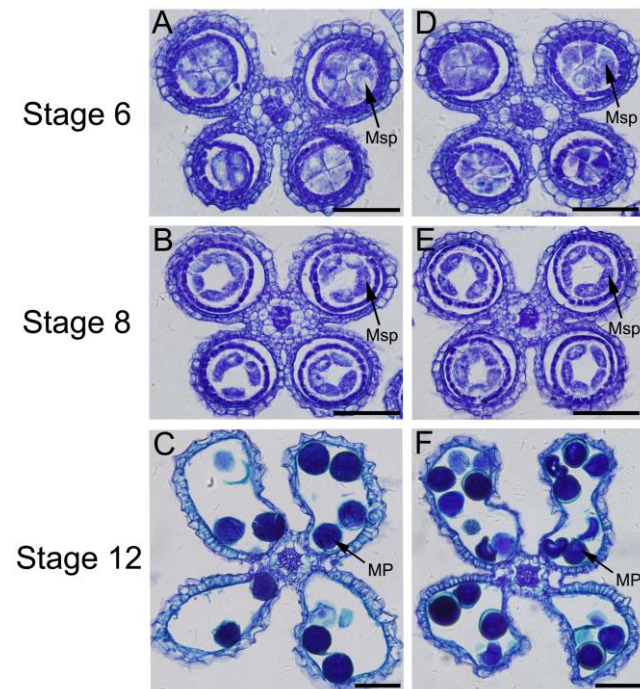

**(A-C)** Anther development analyzed in WT at stage 6 (A), stage 8 (B) and stage 12 (C). Msp, microspore; MP, mature pollen. Bars = 50  $\mu$ m.

**(D-F)** Anther development analyzed in *gsd1-D* mutant at stage 6 (D), stage 8 (E) and stage 12 (F). Msp, microspore; MP, mature pollen. Bars = 50  $\mu$ m.

**Figure S4.** I<sub>2</sub>-KI staining of starch in the second internode of WT and *gsd1-D* at booting and flowering stages.

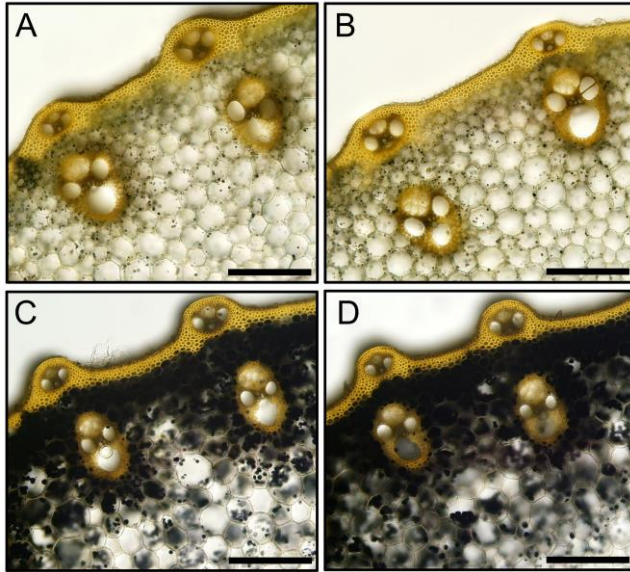

WT (A) and *gsd1-D* (B) starch granules staining at booting stage; WT (C) and *gsd1-D* (D) starch granules staining at flowering stage. Bars = 200  $\mu$ m.

**Figure S5.** Expression profiles of the genes involved in starch synthesis between wild-type and *gsd1-D* mutant during rice grain filling.

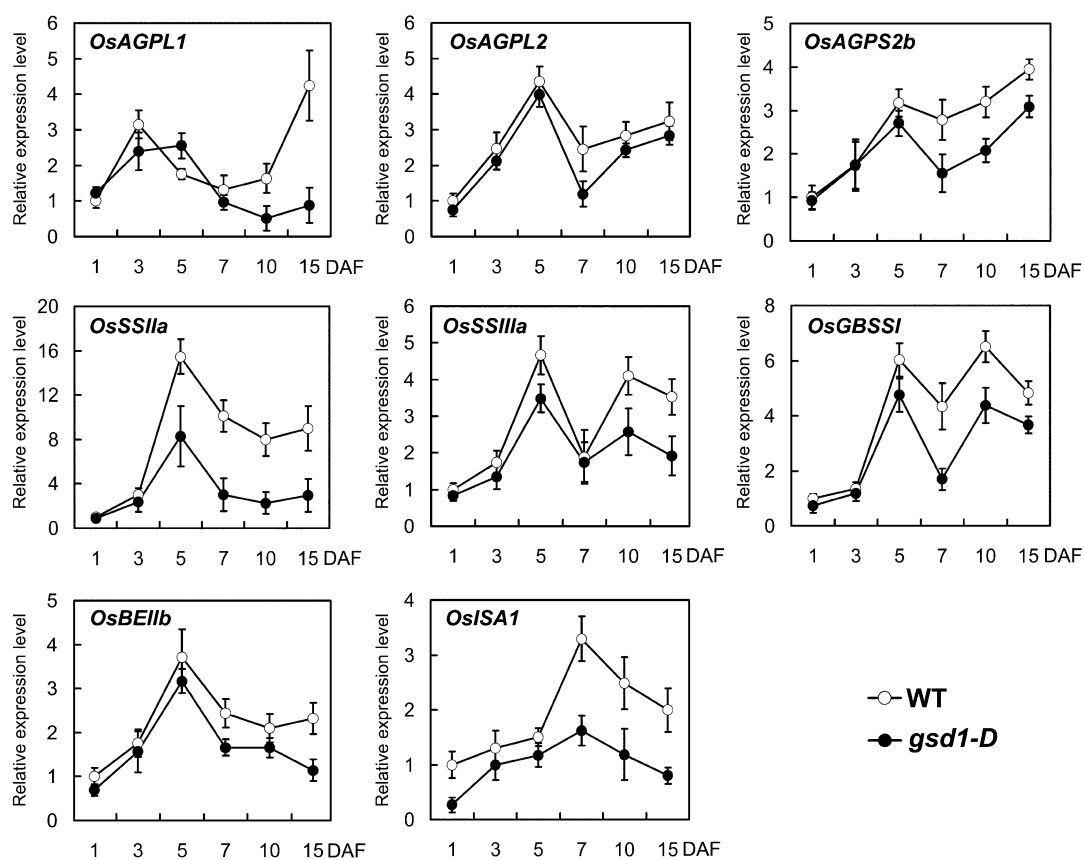

Total RNAs were isolated from 1 to 15 days after flowering (DAF) developing grain of WT and *gsd1-D* mutant. Transcripts of *OsAGPL1*, *OsAGPL2*, *OsAGPS2b*, *OsSS IIa*, *OsSS IIIa*, *OsBE IIb*, *OsGBSS I* and *OsISA1* were determined using quantitative RT-PCR analysis. Rice *actin1* gene was used as a reference for normalization. Relative gene expression levels in 1 day after flowering (DAF) WT grains were set as 1. The results are means  $\pm$  SE of independent triplicate assays.

**Figure S6.** Net photosynthetic activity in flag leaf at 5 DAF in *gsd1-D* mutant and WT plants growing in a greenhouse.

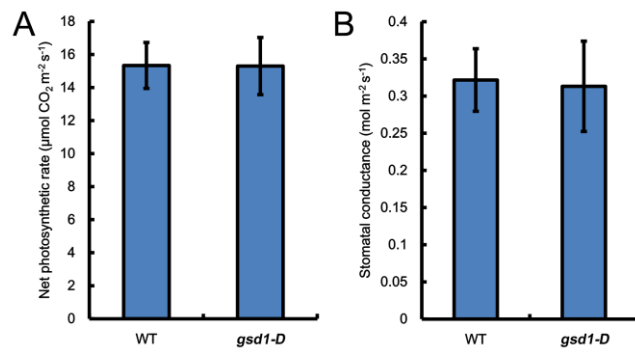

Net photosynthetic rate ( $P_N$ ) (A) and stomatal conductance (B) were measured using a LI-6400 photosynthesis system (LI-COR). Ten flag leaves from each line were measured. Values are means  $\pm$  SE.

**Figure S7.** GC-MS analyses of  $^{13}\text{C}$ -labeled soluble sugars in leaf blade and leaf sheath of *gsd1-D* mutant and WT plants.

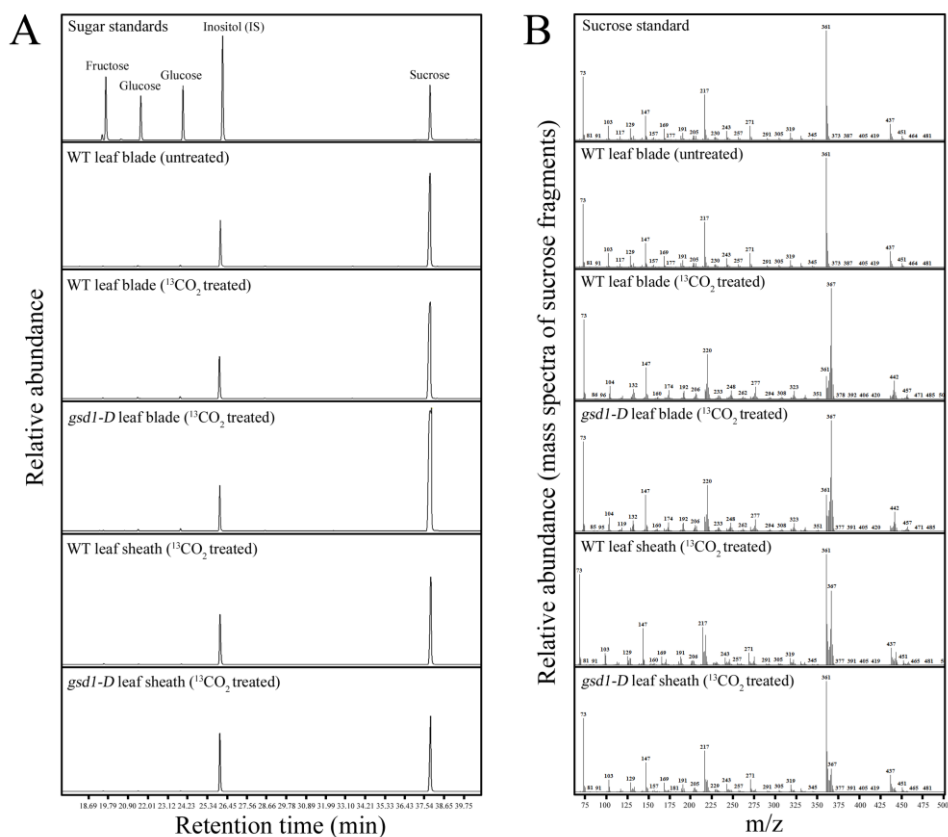

(A) Chromatogram of sugar standards and soluble sugars extracted from rice plants, of which the leaf blade was fed with  $^{13}\text{CO}_2$  for 12 hr photosynthesis and then kept in dark. The determination was conducted after in dark for 6 hr.

(B) Mass spectrum of the  $\text{Si}(\text{CH}_3)_3$  derivative of sucrose standard and labeled sucrose fragmented in electron ionization (EI) model. The most abundant sucrose fragment is 361, which is shifted to 367 in the  $^{13}\text{C}$ -labeled sucrose.



**Figure S8.** Picture of the chamber used for flag leaf photosynthesis fed with  $^{13}\text{CO}_2$ .

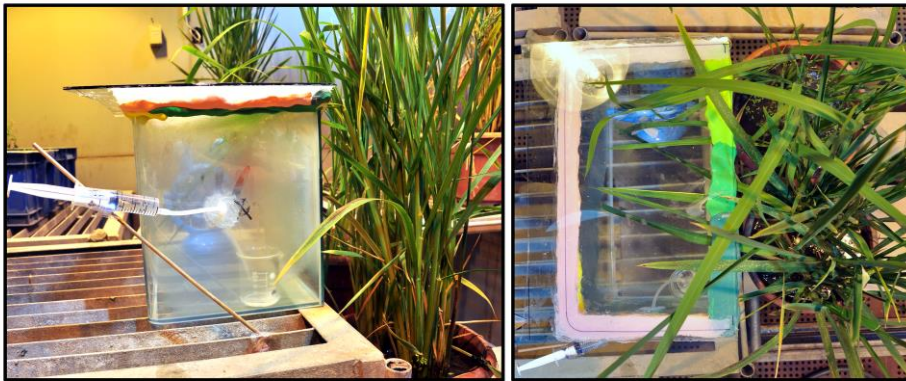

The gas-sealed glass chamber has a lid and a 20 liter space, in which a fan and a thermometer are mounted. A beaker containing sodium bicarbonate- $^{13}\text{C}$  is placed in the chamber.  $^{13}\text{C}$ -labeling  $\text{CO}_2$  is released by addition of 0.5 mM hydrochloric acid through an inlet tube connected with a syringe. The concentration of  $\text{CO}_2$  is maintained approximately to 400 ppm through control of hydrochloric acid injection. The chamber was kept in a phytotron and its temperature and photon flux density were maintained as the same as the phytotron regime.



**Figure S9.** Genotyping analyses of *gsd1-D* T-DNA insertion mutant.

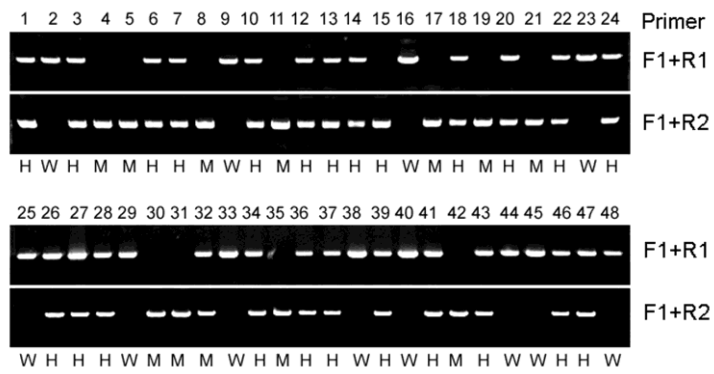

PCR results for genotyping of *gsd1-D* T-DNA insertion lines. F1 and R1 are gene-specific primers, and R2 is the T-DNA specific-primer. W, wild-type; H, heterozygote; M, homozygote.

**Figure S10.** Amino acid sequences of rice remorins were aligned with the remorins from dicotyledonous *Arabidopsis* and moss *Physcomitrella patens*.

The remorin family contains 19 members in rice (*Oryza sativa*), 16 members in *Arabidopsis* (*Arabidopsis thaliana*), and 4 members in moss *Physcomitrella patens*. Remorin protein sequences can be divided in the N-terminal region (underlined with black line) and C-terminal region (underlined with green line). The N-terminal region is highly variable in sequence and in length. The C-terminal region is conserved that contains a coiled-coil domain (shown in red box).

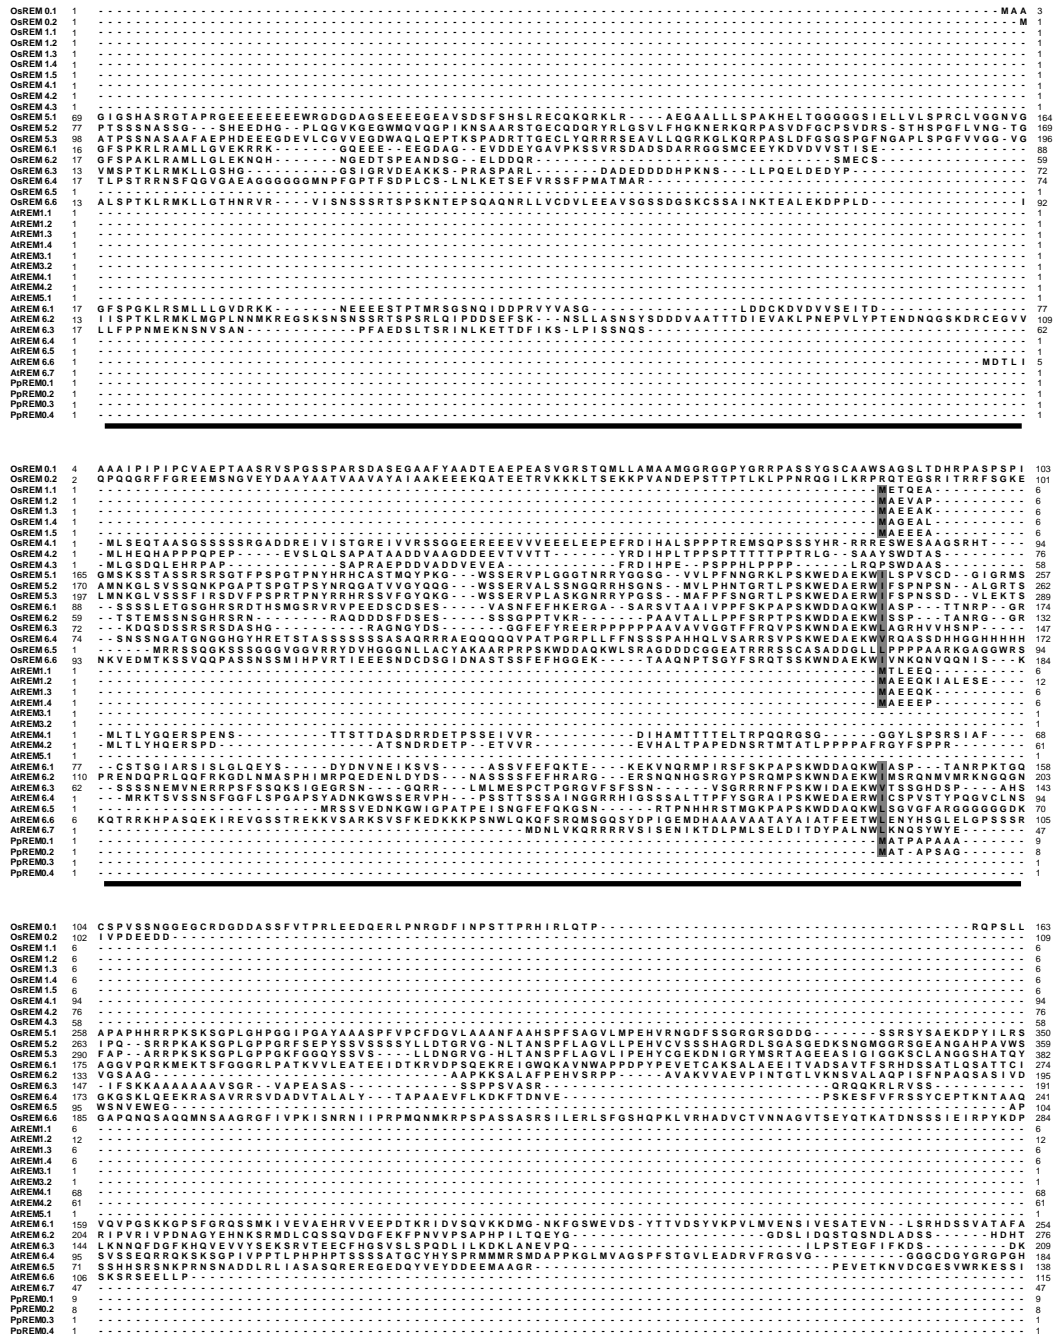

OsREM0.1 164 DRRFERTNVPVPRF IHKATPARLMRRARRSSHNRYRRLGAMDAINEWRLPKVSEEEADVDQTDWQADTLSSRIS ..... SARDWNFEAGGAYE 251  
OsREM0.2 109 -- --GLANVSVRRPVRTAAKI PEGGISGQNMVGVKLDVSPSIRKAPSFAPLPEKKGSMKFEDEGQAIPTVPPNVR..... PTALFPRKESKFF 196  
OsREM1.1 6 ..... PAPAPEP..... TKDIAEERAAVPA..... TKNTPGSA..... 42  
OsREM1.2 6 ..... KEAG..... EKAVIFAASVSPVISA..... KTDDETPPA..... DSKALVVFVEKVA 59  
OsREM1.3 6 ..... KKEVEVTEAPPAAAAAETEPAAKQVAAEKAVIPAPA..... PPAEEKPPV..... DSKALAI..... VEKVA 67  
OsREM1.4 94 ..... SIRSIGDTPAS..... ELPTMRETFEAMVAAANAAAAAANGGDSRAAGVDP..... ALQRI..... LEENPLAIVPDSNP 170  
OsREM1.5 6 ..... ATPAANAAGE..... EKAVIFAASVSPVISA..... KTDDETPPA..... DSKALVVFVEKVA 59  
OsREM1.6 6 ..... KKEVEVTEAPPAAAAAETEPAAKQVAAEKAVIPAPA..... PPAEEKPPV..... DSKALAI..... VEKVA 67  
OsREM4.1 94 ..... SIRSIGDTPAS..... ELPTMRETFEAMVAAANAAAAAANGGDSRAAGVDP..... ALQRI..... LEENPLAIVPDSNP 170  
OsREM4.2 76 ..... SHRSVSE..... EQFMTSREFTAMVAAGTMMQTPNDGNGGDD..... LTIIGED..... LEENPLAIVPDSNP 140  
OsREM4.3 58 ..... HRSLSGGAGGGDDVLFATMSREFTAMVAAGSSAPSPVDPDAPAAADLN..... LLQLARIGENEP..... AANALAIIVP..... 133  
OsREM5.1 351 ..... HRSLSGGAGGGDDVLFATMSREFTAMVAAGSSAPSPVDPDAPAAADLN..... LLQLARIGENEP..... AANALAIIVP..... 133  
OsREM5.2 360 TRVQRMDASVAGSSPLPTSQESVQACTDEQIEITLDTLTSKPEISRKQVATQTSPELSSSSPSGRPSFS..... RSLSVQVKEL..... ESC 445  
OsREM5.3 383 NRVRRRLDTAIESPSPSTQASVQ..... DEQVQITEESASITPILIRKQDAAITQSPNLSRSSSSVSTPFI..... HLLTTHVREK..... ENC 465  
OsREM5.4 242 AVAAGNIDHRRDIGTEMPTGSSSTT..... SRCHTPKSTSPARHNTASRSGLLVYAGGGGAGDDIS..... DLAD..... CDFAKL 317  
OsREM6.2 196 EPAPAVRSVMDRDMGTEMPIASQEP..... SRTGTPVRIASSTPSRPTPQRNA..... EISIGFQPNK..... MEMS..... EELQMNTRKEIM 273  
OsREM6.3 191 ..... EAAAVSMRDVGTETMPASKEQ..... SRSOTPAQAATPSLSPGCVPTSPRGAASASSAS..... SREQLIRTRREIA 261  
OsREM6.4 242 AVAAGNIDHRRDIGTEMPTGSSSTT..... SRCHTPKSTSPARHNTASRSGLLVYAGGGGAGDDIS..... DLAD..... CDFAKL 317  
OsREM6.5 105 AAMAPALKAAAGDEQDVKVDVAYVQRCVVLSDVGTETMPGSGKPSRANTPRVAP..... SRTGTPVRIASSTPSRPTPQRNA..... EISIGFQPNK..... MEMS..... EELQMNTRKEIM 273  
OsREM6.6 285 KAI PAVHSVSRDVGTEMPIPSQDP..... SRTGTPVRIASSTPSRPTPQRNA..... EISIGFQPNK..... MEMS..... EELQMNTRKEIM 273  
AREM1.1 6 ..... KKV..... IMP..... EAVSE..... PSPPKESK..... DSKAIVL..... 37  
AREM1.2 12 ..... SPAKVTPAPADTPAPAPAEIPAPAPAPTADVTQDVAEEK..... IQNPPPEGIF..... DSKALV..... 72  
AREM1.3 6 ..... TSKVDVESPA..... VLPAKEPTAPV..... EVADEK..... IHNPPF..... VESKALAV..... 50  
AREM1.4 6 ..... KKVETVSEPTPRE..... VPVEKPAAAAADVAPQEKVAPPVLPSPAPAEKQ..... ESKAIVP..... 65  
AREM1.1 1 ..... ..... MNSTVQ..... 7  
AREM2.1 68 ..... DQTTSSG..... ENFTTVSREFNALVIAGSSMDNNSGQNGGHRDVIIRDERNELTRIGENDDVDGQVQPEE..... SNPVAIVPDDVY 151  
AREM2.2 61 ..... SATTMSEG..... ENFTTVSREFNALVIAGSSMDNNSGQNGGHRDVIIRDERNELTRIGENDDVDGQVQPEE..... SNPVAIVPDDVY 151  
AREM1.1 255 ..... MMMDAAT..... D..... AQAVS..... RRDATQMSPEGSI RFSRQCQSFSP..... SPSPPPISELLNAH 54  
AREM1.2 277 TGGPARIKSVCMRDGMGTEMPIPSQEP..... SRSVTPVGGATPLRSPSSLPSTPRGGQPESSMSKNTR..... RELS..... EEEKAKTRREIV 358  
AREM1.3 210 FLRYEAAQVHRDGMGTEMPIGQVTT..... SRSCTPFKSSSARHNTPSQLGPLETKN..... VIDIS..... EFEDKRLSOS 281  
AREM1.4 185 VDDAKAATATG..... SHERDALTTITET..... RLSLISWELATITET..... DSKALVVFVEKVA 59  
AREM1.5 139 NPTAVIRSVCRDGMGTEMPIGQEP..... SRTAPVTRVTTVGRSVPVTS..... ..... PVRSQRGE 193  
AREM1.6 115 ..... LEERPSSLRRFSQGLSFDISETKDHPKPTLSPKRRSSVKTTFSMNLMDHHTKONODESEKHERQKPV..... SPPRIQPPRLRS 199  
PpREM1.1 9 ..... KNYVNEKSEL..... LEYSVAIA..... PEAAAPVDDAGNPAEPPAPAVESKAITTG..... APAAVT..... 48  
PpREM1.2 8 ..... TEAIAPT..... HEVAAPPAVESKAIISQ..... ..... APPTAAETAVIPE 48  
PpREM1.3 1 ..... ..... MEQRKTK 9  
PpREM1.4 1 ..... ..... EKTRLEIV 8

OsREM0.1 252 GSDHNGGAFNHSDDGNSPVAVQRMGRVPOGSAKXKHEN..... FVHKLVAWNNIEIEKLIIDLIRIEMDIDEWMMRITDIAEEMRRLE..... 336  
OsREM0.2 197 DQDAKIPRVPDVRPTASFRKKEKSKFEQDKANQMSPLASAPTSYSSEAEAMADTWEKEAKKIKKINMTMDTVEWAEKAKAKRQEMLEK..... 293  
OsREM1.1 42 ..... PAKAAATPG..... SVDRDALANVELER..... KLSMIKAWEE..... EKAKENKAKKMSQISWENKAKAATLRTGE..... 113  
OsREM1.2 36 VDDAKAATATG..... SHERDALTTITET..... RLSLISWELATITET..... DSKALVVFVEKVA 59  
OsREM1.3 39 ..... VAEATG..... SAERDVALKIVSEK..... RLVLINAWEE..... EAAERAAKLLSVISWENKAKAEMELKRE..... 109  
OsREM1.4 60 DKPHAEKATATATPT..... RTSNDRIALAKVETPK..... RESLAKAWEE..... EAAERAAKLLSVISWENKAKAEMELKRE..... 137  
OsREM1.5 68 ALGRLGKGNIAATWASKEE..... LAAGSGPAPVGEK..... ESKIAAWEL..... EAKVNRFRREVVNGWODVEKAWNLLKVE..... 253  
OsREM4.1 171 IATPARSRAQLEW..... VPAAGSPAPPEVAVQVKEE..... VETVSAWTE..... EAKVNRFRREVVNGWODVEKAWNLLKVE..... 221  
OsREM4.2 141 IATPARSRAQLEW..... VPAAGSPAPPEVAVQVKEE..... VETVSAWTE..... EAKVNRFRREVVNGWODVEKAWNLLKVE..... 221  
OsREM4.3 133 ALGRLGKGNIAATWASKEE..... LAAGSGPAPVGEK..... ESKIAAWEL..... EAKVNRFRREVVNGWODVEKAWNLLKVE..... 253  
OsREM5.1 434 ALKPEVRDQVDDQVTVTRSKKHVTRGSDRRSTNIV..... EWKKTIVETRAP..... ESKVNRFRREVVNGWODVEKAWNLLKVE..... 522  
OsREM5.2 446 FSKLEIRDVQMDRVTLTRWSKHHVTRGSEKSTNII..... EWKKTIVETRAP..... ESKVNRFRREVVNGWODVEKAWNLLKVE..... 534  
OsREM5.3 466 FSKLEIRDVQMDRVTLTRWSKHHVTRGSEKSTNII..... EWKKTIVETRAP..... ESKVNRFRREVVNGWODVEKAWNLLKVE..... 534  
OsREM6.1 358 LLGTGLKGNIAATWASKEE..... LAAGSGPAPVGEK..... ESKIAAWEL..... EAKVNRFRREVVNGWODVEKAWNLLKVE..... 253  
OsREM6.2 274 DLGRLGKGNIAATWASKEE..... LAAGSGPAPVGEK..... ESKIAAWEL..... EAKVNRFRREVVNGWODVEKAWNLLKVE..... 221  
OsREM6.3 282 DLGRLGKGNIAATWASKEE..... LAAGSGPAPVGEK..... ESKIAAWEL..... EAKVNRFRREVVNGWODVEKAWNLLKVE..... 221  
OsREM6.4 318 DLGRLGKGNIAATWASKEE..... LAAGSGPAPVGEK..... ESKIAAWEL..... EAKVNRFRREVVNGWODVEKAWNLLKVE..... 221  
OsREM6.5 179 SPKCGGSSRSVAVGGVLDLRAKRADQGHQVAA..... TITAVSAPATAWD..... EAKVNRFRREVVNGWODVEKAWNLLKVE..... 264  
OsREM6.6 378 ALGRLGKGNIAATWASKEE..... LAAGSGPAPVGEK..... ESKIAAWEL..... EAKVNRFRREVVNGWODVEKAWNLLKVE..... 253  
AREM1.1 38 VAAKEPTEDKVV..... GSHRDAVLRVLEQEK..... RLSLAKAWEE..... EKAKENKAKKISSGAWENSKAVVELKRE..... 111  
AREM1.2 73 EKPEVPAKAPAS..... ASLDKVLKADISEK..... RLSLAKAWEE..... EKAKENKAKKISSGAWENSKAVVELKRE..... 148  
AREM1.3 51 ..... SADRVALARVETK..... RLSLAKAWEE..... EKAKENKAKKISSGAWENSKAVVELKRE..... 148  
AREM1.4 66 VP..... KEVEEKE..... GSNRDAVLRVLEQEK..... RLSLAKAWEE..... EKAKENKAKKISSGAWENSKAVVELKRE..... 138  
AREM1.1 7 ..... RAMP..... MEPNIRGORE..... QSVKAWEL..... EKAKENKAKKISSGAWENSKAVVELKRE..... 59  
AREM1.2 152 NRDSSENNIVLASS..... GGNRMVTTASVORVREE..... VEAKIATWAKAKINRFRDVAVNGWNEVHIANWMMKLE..... 230  
AREM1.3 154 ..... GSDPGSD..... NGPQSRVGTVGRKRE..... VEAKIATWAKAKINRFRDVAVNGWNEVHIANWMMKLE..... 208  
AREM1.1 65 SNRAVVDKLVQVDEKVTTRWKRRLQYHGNGS..... MRDHYGKATNHEDTL..... CATETANISWENKAKAEMELKRE..... 134  
AREM1.1 333 VLGTGLKGNIAATWASKEE..... LAAGSGPAPVGEK..... ESKIAAWEL..... EAKVNRFRREVVNGWODVEKAWNLLKVE..... 253  
AREM1.2 359 ALGRLGKGNIAATWASKEE..... LAAGSGPAPVGEK..... ESKIAAWEL..... EAKVNRFRREVVNGWODVEKAWNLLKVE..... 221  
AREM1.3 282 ..... CSYVTS..... WNSVEEIEISLRFDSSEL..... RRSSEKAPVDDQD..... EAKVNRFRREVVNGWODVEKAWNLLKVE..... 440  
AREM1.4 256 PCREVRKMDKQARMKRRKRRVMSRIRIREPQ..... VDNSEASSSSWITREPMTLSLREAAWENL..... KAKAEMELKRE..... 344  
AREM1.5 104 ..... EAGMIAHRRK..... SRSSEKALSHVFKATLSE..... KAASABARLARYHRE..... GAAPRRLRCCSWLFL..... 427  
AREM1.6 199 EPRAVPPPPPLLSPPRLRPPREKTRQSSSEHTRKD..... DSTADAWEL..... EKAKENKAKKISSGAWENSKAVVELKRE..... 281  
AREM1.7 117 KIGESFRKLLLEVPSENRPPQEGISSGOTSGIASS..... SHADSWEL..... EKAKENKAKKISSGAWENSKAVVELKRE..... 197  
PpREM1.1 45 ..... IHEKATQKLEH..... LHSNVAWEDNKIEATRETHREEDITRETTN..... KAKAEMELKRE..... 122  
PpREM1.2 49 AKKAEPEATEPG..... TIHHEKATQKLEH..... LHSNVAWEDNKIEATRETHREEDITRETTN..... KAKAEMELKRE..... 122  
PpREM1.3 10 LLP..... RKANITAWAKGEEKDVTLEGNKGAQLEH..... LQSVLATRAAWEE..... EKAKYMRPQDEAKIWAEEH..... KAKAEMELKRE..... 94  
PpREM1.4 9 ALGTGLKGNIAATWASKEE..... LAAGSGPAPVGEK..... ESKIAAWEL..... EAKVNRFRREVVNGWODVEKAWNLLKVE..... 253

N-terminal residues

C-terminal residues

OsREM0.1 336 ..... ILEKELKARR..... EKMKAKAKDAQKADAKKIKHEHTADNDSAVERAMVSRFGK..... LWSLAFLL..... 399  
OsREM0.2 293 ..... GDSLEKKEKAL..... EYNDIETRIKVAASALVETVAREAEKRVREKAKRVRGK..... LPGACGCF..... 357  
OsREM1.1 113 ..... EKLEKKAAYE..... EKVMRNOVAIHKAAEELVETVAREAEKRVREKAKRVRGK..... TPTKFLSCFGS..... 179  
OsREM1.2 108 ..... ETLKELKKAAYE..... EKVMRNOVAIHKAAEELVETVAREAEKRVREKAKRVRGK..... TPTKFLSCFGS..... 179  
OsREM1.3 109 ..... QLEKKAAYE..... EKKNKALLHKAEE..... RALTLKAOBELMAEEMAKVRAGE..... APTKFLGLKA..... 175  
OsREM1.4 137 ..... EELKKAAYE..... EKAKNREI..... VHKAAEELVETVAREAEKRVREKAKRVRGK..... TPTKFLSCFGS..... 179  
OsREM1.5 140 ..... ETLKELKKAAYE..... EKVMRNOVAIHKAAEELVETVAREAEKRVREKAKRVRGK..... TPTKFLSCFGS..... 179  
OsREM4.1 253 ..... RKLKELKKAAYE..... EKADNEKARRAAE..... RASAEAKQTKVAVLEANFRVAGR..... APSKRSFF..... 316  
OsREM4.2 221 ..... RKLKELKKAAYE..... EKADNEKARRAAE..... RASAEAKQTKVAVLEANFRVAGR..... APSKRSFF..... 316  
OsREM4.3 197 ..... RKLKELKKAAYE..... EKADNEKARRAAE..... RASAEAKQTKVAVLEANFRVAGR..... APSKRSFF..... 316  
OsREM5.1 522 ..... MKLEKRSYSM..... ELRINTLSARHTHIVRSTTTNLDHSTKVRPSHSKNGQ..... MSSLSGCFCHAF..... 622  
OsREM5.2 534 ..... MKLEKRSYSM..... ELRINTLSARHTHIVRSTTTNLDHSTKVRPSHSKNGQ..... MSSLSGCFCHAF..... 622  
OsREM5.3 552 ..... MKLEKRSYSM..... ELRINTLSARHTHIVRSTTTNLDHSTKVRPSHSKNGQ..... MSSLSGCFCHAF..... 622  
OsREM6.1 443 ..... VDEIMRARRAQ..... KMSQLSARHTHIVRSTTTNLDHSTKVRPSHSKNGQ..... MSSLSGCFCHAF..... 622  
OsREM6.2 366 ..... AKLEKARQ..... ESSLKLAARHAAE..... REAEERNDNEAAARTEGAAIKRKT..... GHIPSSIS..... CWCWCL..... 423  
OsREM6.3 358 ..... VDAEMIAHRRK..... SRSSEKALSHVFKATLSE..... KAASABARLARYHRE..... GAAPRRLRCCSWLFL..... 427  
OsREM6.4 404 ..... VKIDMIRSNLE..... EKLMRMTVHREAEWRAADAKHLQDCKRRAAEKSHHHHHHLAGSNACGCFPCNGSNNIISGNLLNYY 493  
OsREM6.5 264 ..... EGAEMIRLRQ..... RTAGRLTADADAARA..... RAAREALALGRPGGAKGWLTRASWSSGSGRS..... SLSLRLPLLCR..... 340  
OsREM6.6 461 ..... EHAELLESAN..... KAELETRVAREAEKAVNNAARAVHVELTR..... GRVPSGICLCCSGCFQH..... 532  
AREM1.1 111 ..... EELKKAAYE..... EKKNKALLHKAEE..... RALTLKAOBELMAEEMAKVRAGE..... APTKFLGLKA..... 175  
AREM1.2 148 ..... EELKKAAYE..... EKAKNREI..... VHKAAEELVETVAREAEKRVREKAKRVRGK..... TPTKFLSCFGS..... 179  
AREM1.3 126 ..... EKLKKAAYE..... EKKNKALLHKAEE..... RALTLKAOBELMAEEMAKVRAGE..... APTKFLGLKA..... 175  
AREM1.4 138 ..... EELKKAAYE..... EKAKNREI..... VHKAAEELVETVAREAEKRVREKAKRVRGK..... TPTKFLSCFGS..... 179  
AREM1.5 59 ..... RSVETNLT..... KATVFRDNERIEIIVASARA..... YESIRKEELKVEKALNLTGR..... KPTSLC..... 123  
AREM1.6 58 ..... RSVETNLT..... KATVFRDNERIEIIVASARA..... YESIRKEELKVEKALNLTGR..... KPTSLC..... 123  
AREM1.1 230 ..... RKLKELKKAAYE..... EKADNEKARRAAE..... RASAEAKQTKVAVLEANFRVAGR..... APSKRSFF..... 316  
AREM1.2 208 ..... RKLKELKKAAYE..... EKADNEKARRAAE..... RASAEAKQTKVAVLEANFRVAGR..... APSKRSFF..... 316  
AREM1.3 135 ..... RKLKELKKAAYE..... EKADNEKARRAAE..... RASAEAKQTKVAVLEANFRVAGR..... APSKRSFF..... 316  
AREM1.4 418 ..... VKVEIIGRAQ..... DLMLKATIERAAE..... RAAEAKKDHAAKTEGAEIRRT..... GKVPSLLFSCFCS..... 486  
AREM1.5 440 ..... AKVDEWIAE..... EKMKLAKDSEKRAAE..... RAAEAKKDHAAKTEGAEIRRT..... GKVPSLLFSCFCS..... 486  
AREM1.6 388 ..... VLDKMSNLD..... EKMLKAKDSEKRAAE..... RAAEAKKDHAAKTEGAEIRRT..... GKVPSLLFSCFCS..... 486  
AREM1.7 197 ..... SELKRRGINN..... HYKSLRIQLLAGAKQLLEKRENEADVHGKVKSRGK..... VNNYFCFRY..... 263  
PpREM1.1 120 ..... EKLKKAAYE..... EKKNKALLHKAEE..... RALTLKAOBELMAEEMAKVRAGE..... APTKFLGLKA..... 175  
PpREM1.2 122 ..... EKLKKAAYE..... EKKNKALLHKAEE..... RALTLKAOBELMAEEMAKVRAGE..... APTKFLGLKA..... 175  
PpREM1.3 94 ..... VKVEIIGRAQ..... DLMLKATIERAAE..... RAAEAKKDHAAKTEGAEIRRT..... GKVPSLLFSCFCS..... 486  
PpREM1.4 96 ..... IHAELLESAN..... KAELETRVAREAEKAVNNAARAVHVELTR..... GRVPSGICLCCSGCFQH..... 532

Coiled-coil domain

**Figure S11.** Phylogenetic analysis and antibody developed for GSD1.

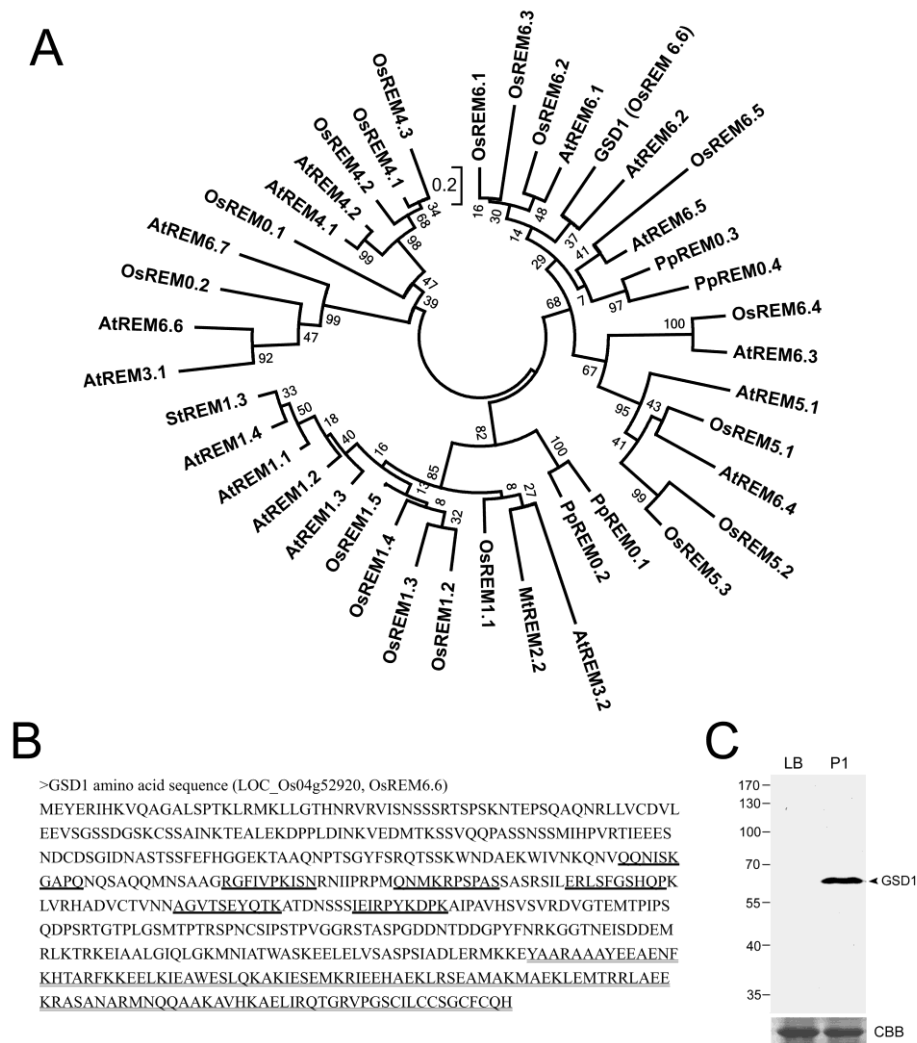

**(A)** Phylogenetic analysis of GSD1 and its homologs. Unrooted phylogenetic tree of GSD1 and its homologs was constructed with bootstrap values after 1,000 trials using the maximum likelihood method. The scale bar corresponds to 0.2 amino acid substitutions per position in the sequence. Plant species are as follows: *Os*, *Oryza sativa*; *At*, *Arabidopsis thaliana*; *Pp*, *Physcomitrella patens*; *St*, *Solanum tuberosum*; *Mt*, *Medicago truncatula*.

**(B and C)** GSD1 specific peptides (peptides of the single underlines) were used to produce polyclonal antibodies (B). The antibody specificity was examined by western blot performed on total extract from leaf blade (LB) and booting panicle (P1) (C). CBB, Coomassie Brilliant Blue.

**Figure S12.** Phenotypic comparison of wild-type and *GSD1* transgenic plants.

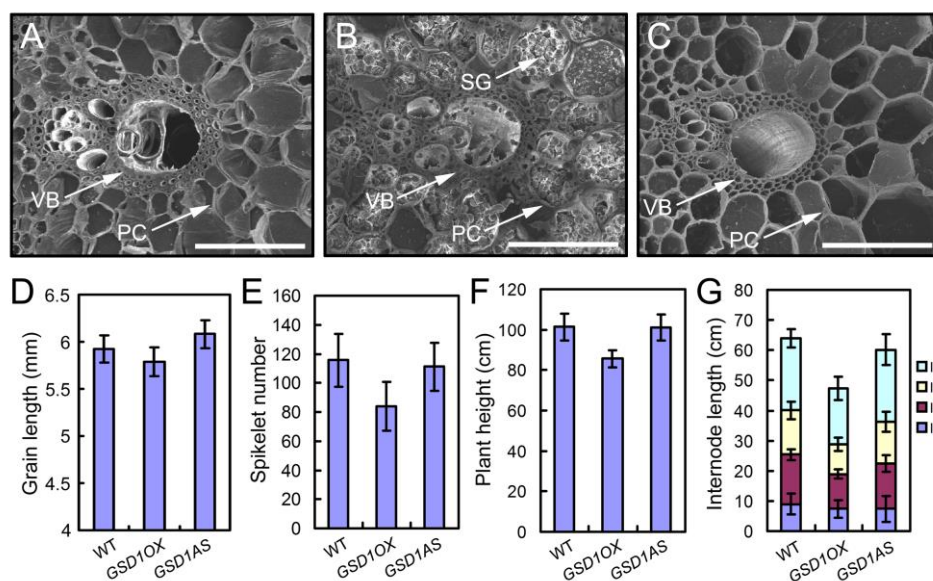

**(A-C)** SEM observation of the second internode sections of wild-type (E) *GSD1OX* (F) and *GSD1AS* (G) in matured grain plants. PC: parenchyma cell; SG: starch granules; VB: vascular bundle. Bars = 50  $\mu$ m.

**(D-G)** Statistic analysis of grain length (D), spikelet number (E), plant height (F), and internode length (G) in WT (left), *GSD1OX* (middle) and *GSD1AS* (right). Sixty seeds were analyzed for seed size. Twenty panicles were analyzed for spikelet number. Twenty plants were analyzed for plant height and internode length. Values are means  $\pm$  SE.

**Figure S13.** Net photosynthetic activity in the flag leaves of 5 DAF in WT and GSD1 transgenic plants growing in a greenhouse.

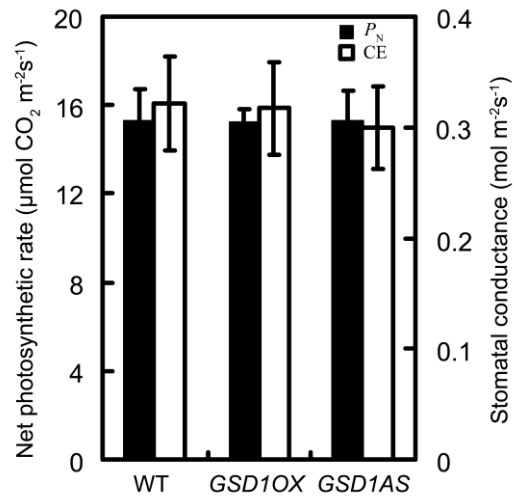

Net photosynthetic rate ( $P_N$ ) was measured using a LI-6400 photosynthesis system (LI-COR). At least ten flag leaves from each line were measured. Values are means  $\pm$  SE.

**Figure S14.** Immunogold labeling of GSD1 in 4 week old rice shoot tissues.

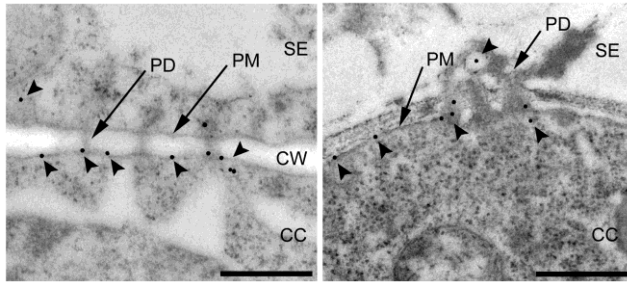

GSD1 is localized at the neck regions and the channel of PD and also along the plasma membrane of the companion cells. Arrowheads indicate immunogold labeling particles. CC, companion cell; CW, cell wall; PD, plasmodesma; PM, plasma membrane; SE, sieve element. Bars = 500  $\mu$ m.



**Figure S15.** CFDA-based DANS dye loading assays in tobacco (*Nicotiana benthamiana*) leaves.

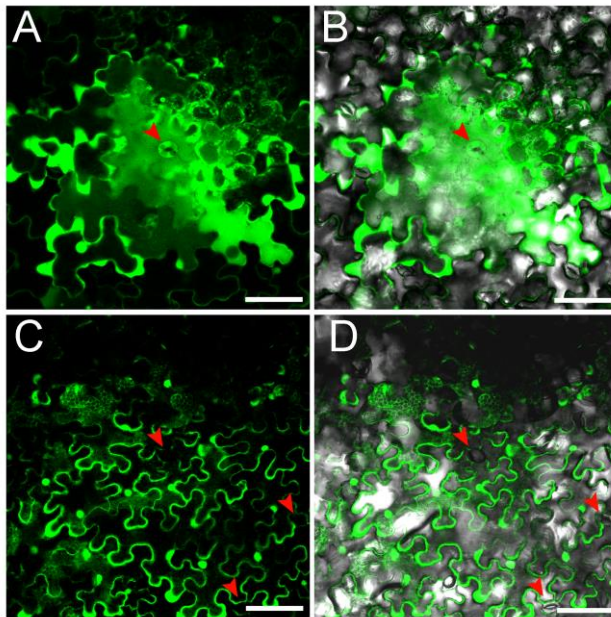

Carboxyfluorescein diacetate (CFDA) was dropped onto the adaxial epidermis of tobacco leaves. CFDA dye entered the pavement cells and guard cells in the adaxial epidermis and was converted by cellular esterase catalysis to CF which illuminates fluorescent signals in the pavement cells and guard cells (A and B). No fluorescent signal is detected in guard cells in the abaxial epidermis (C and D). Red arrowhead indicates mature guard cell. Bars = 100  $\mu\text{m}$ .

**Figure S16.** Subcellular localization analysis of OsACT1 in tobacco epidermal cells.

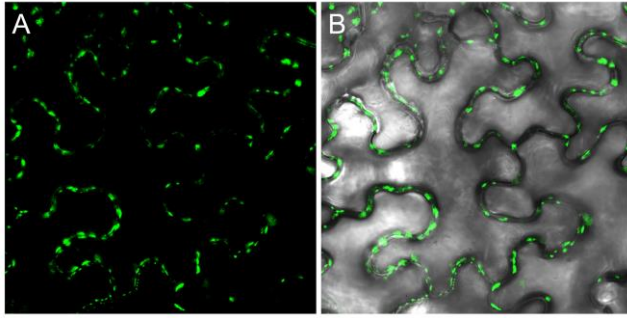

**(A)** and **(B)** OsACT1 fused to GFP (*GFP-OsACT1*) was transformed into tobacco leaves. Confocal images showing OsACT1 GFP fluorescence signals on PM with spotty distribution (A). OsACT1 GFP fluorescence merged with differential interference contrast (DIC) image (B).

**Figure S17.** Serial images of z-sections from the top surface to the bottom of the epidermal cells.

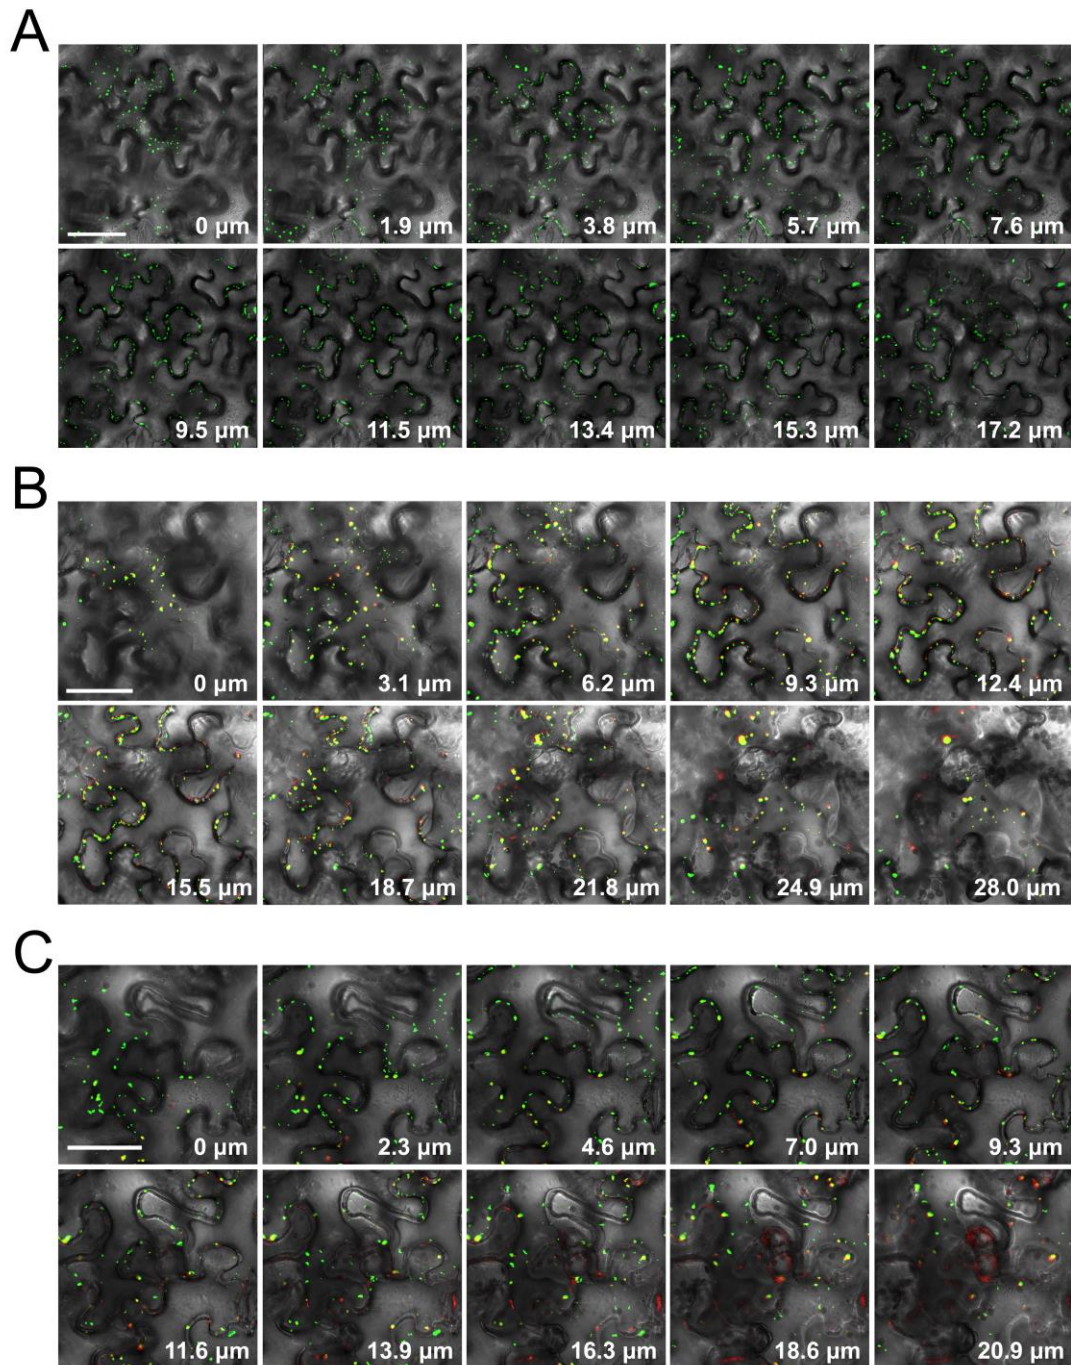

**(A)** Serial images of z-sections of GFP-OsACT1 fluorescence show that OsACT1 is unevenly distributed on the plasma membrane. **(B)** Serial z-section images show that mCherry-GSD1 fluorescence was precisely co-localized with GFP-OsACT1 fluorescence. **(C)** Co-expressed *YN-OsACT1*, *YC-GSD1* and *mCherry-PDCB1* in epidermal cells and the serial z-section images show that mCherry fluorescence was precisely co-localized with YFP fluorescence. Each picture is a merged image of fluorescence and DIC channels. Bars = 50 μm.



Supplemental Table2. List of primers used in this study.

| Primer name | Primer sequence ( 5'→3' )        | Purpose                                                                               |
|-------------|----------------------------------|---------------------------------------------------------------------------------------|
| GSD1 F      | TTCCCCAGTCCCTCCATCT              | Cloning                                                                               |
| GSD1 R      | CGTTGAGCAACAACCAAGTGT            |                                                                                       |
| GSD1P F     | GGCTGGAACAAACAAGACAAC            | Cloning                                                                               |
| GSD1P R     | CAATGGGAAATGTCAATTAAGG           |                                                                                       |
| OsACT1 F    | ACCACCACCTCCACCTCCTC             | Cloning                                                                               |
| OsACT1 R    | TGAAAACCTTTGTCCACGCTAATG         |                                                                                       |
| AtPDLP1 F   | AAACAAAAGACAAAAAACAACG           | Cloning                                                                               |
| AtPDLP1 R   | AAAAATAAGAATCAATAAGCATCATA       |                                                                                       |
| AtPDLP5 F   | AGCAAGTCTTCGCTCTTCAA             | Cloning                                                                               |
| AtPDLP5 R   | TTCCCACTTTGTCCCTTTCAT            |                                                                                       |
| AtPDCB1 F   | ACATTTTGTCTGAACGCATCT            | Cloning                                                                               |
| AtPDCB1 R   | CTCGAAACGATAACTAAGTGC            |                                                                                       |
| Q-GSD1 F    | ACAGAAAAGGTGGCACAAT              | QRT-PCR                                                                               |
| Q-GSD1 R    | ATGGCTTCGCTTCGCAAT               |                                                                                       |
| OsAct1 F    | TCGTCTGCGATAATGGAAC              | QRT-PCR                                                                               |
| OsAct1 R    | CTCGATGGGGTACTTGAGG              |                                                                                       |
| OsAGPL1 F   | GGAAGACGGATGATCGAGAAAG           | QRT-PCR                                                                               |
| OsAGPL1 R   | CACATGAGATGCACCAACGA             |                                                                                       |
| OsAGPL2 F   | GAGGTTGATGGAAAGATTGAA            | These primers were synthesized according to previously reported by Ohdan et al., 2005 |
| OsAGPL2 R   | CCTTGTGAGAGGAAAGAGTTG            |                                                                                       |
| OsAGPS2b F  | AACAATCGAAGCGCGAGAAA             |                                                                                       |
| OsAGPS2b R  | GCCTGTAGTTGGCACCCAGA             |                                                                                       |
| OsSSIIa F   | TATGGGGGGAACAGACAG               |                                                                                       |
| OsSSIIa R   | GTATCACAAGGACAGAGCGA             |                                                                                       |
| OsSSIIIa F  | GCCTGCCCTGGACTACATTG             |                                                                                       |
| OsSSIIIa R  | GCAAACATATGTACACGGTTCTGG         |                                                                                       |
| OsBEIIb F   | ATGCTAGAGTTTGACCGC               |                                                                                       |
| OsBEIIb R   | AGTGTGATGGATCCTGCC               |                                                                                       |
| OsGBSSI F   | AACGTGGCTGCTCCTTGAA              |                                                                                       |
| OsGBSSI R   | TTGGCAATAAGCCACACACA             |                                                                                       |
| OsISA2 F    | TAGAGGTCTCTTGGAGG                |                                                                                       |
| OsISA2 R    | AATCAGCTTCTGAGTCACCG             |                                                                                       |
| pGSD1-L F   | TTTTGAATTCACAAGACAACACTAC        | Promoter-GUS                                                                          |
| pGSD1-S F   | TTTTGAATTCAGACTAAAAAAGAGG        |                                                                                       |
| pGSD1-LS R  | TTTTCCATGGTTCCCTCTCTCTC          |                                                                                       |
| F1          | CCAAAAGGGGAGTGGTAGC              | Genotyping                                                                            |
| R1          | CCAGTCGCAATTTCTTTCC              |                                                                                       |
| R2          | ACAAATCGCCCGCAGAAG               |                                                                                       |
| GSD1OX F    | CCGAGCTCCTCCATCTCACTCTC          | Overexpression                                                                        |
| GSD1OX R    | ATATCTAGATCCCTAATTGTCAAGCATAACAC |                                                                                       |
| GSD1AS F    | TCTCTAGACCCCTCCATCTCACTCTCAC     | Anti-sense knockdown                                                                  |
| GSD1AS R    | TTGAGCTCCCTAATTGTCAAGCATAACAC    |                                                                                       |

|               |                                        |                          |
|---------------|----------------------------------------|--------------------------|
| L-GSD1 F      | AGAGTCTAGAAATGGAGTATGAAAG              | Subcellular localization |
| L-GSD1 R      | ACAAGATCTTTGACAGAAGCAAC                | and BiFC                 |
| L-GSD1N F     | AATCTAGACATGGAGTATGAAAGG               | Subcellular localization |
| L-GSD1N R     | TTAGATCTTTCTTTCTTCATCCG                |                          |
| L-GSD1C F     | AATCTAGAGAAAGAATATGCAGC                | Subcellular localization |
| L-GSD1C R     | TTGGATCCGTGTTGACAGAAG                  |                          |
| L-OsACT1 F    | TTAATCTAGATATGGCTGACGCCGAGGATA         | Subcellular localization |
| L-OsACT1 R    | AATTTGATCATTAGAAGCATTTCCTGTGCA<br>CAAT | and BiFC                 |
| 531PDLP1 F    | TTTCCTCGAGATGAAACTCACCTATC             | Subcellular localization |
| 531PDLP1 R    | TTTTACTAGTGCATCATATTTATTACTCTTC        | and BiFC                 |
| 531PDLP5 F    | TTTCCTCGAGATGATCAAGACAAAGAC            | Overexpression           |
| 531PDLP5 R    | TTTTACTAGTTTACACCATTTCATC              |                          |
| PDCB1N F      | AAAACCTCGAGATGGCTGCTCTGGTG             | Subcellular localization |
| PDCB1N R      | AAAACCATGGTGAGGCACTAGAATG              |                          |
| PDCB1C F      | AAAATCTAGAGTGTGTGTGTAAGAC              | Subcellular localization |
| PDCB1C R      | AAAAGGATCCGAGCATCAGGAAAG               |                          |
| 1007mCherry F | TTTTGTCGACGATGGTGAGCAAGG               | Subcellular localization |
| 1007mCherry R | TTTTTCTAGACTTTACTTGTACAGCTCG           |                          |
| 1130mCherry F | TTTTACTAGTGATGGTGAGCAAGG               | Subcellular localization |
| 1130mCherry R | TTTTGGATCCTTACTTGTACAGCTC              |                          |
| 2011-YFPN F   | TAGTCTCGAGATGGTGAGCAAG                 | BiFC                     |
| 2011-YFPN R   | AGCTCTAGAGCCATGATATAGACG               |                          |
| 2011-YFPC F   | CACTCGAGATGGACAAGCAG                   | BiFC                     |
| 2011-YFPC R   | TTCTAGAGTCTTGTACAGCTCGTC               |                          |

**Ohdan T, Francisco PB, Sawada T, Hirose T, Terao T, Satoh H, Nakamura Y** (2005) Expression profiling of genes involved in starch synthesis in sink and source organs of rice. *Journal of Experimental Botany* **56**: 3229-3244
